# Supplementary material for: Centred nine-metal rings of lanthanides
Source: Royal Society of Chemistry journal article supplement (doi:10.1039/c3cc48708c), 2013-12-20
Supplement: c3cc48708c.pdf [file c3cc48708c.pdf]

## Supporting Information

### Centred nine-metal rings of lanthanides

Karzan H. Zangana,<sup>a</sup> Eufemio Moreno Pineda,<sup>a</sup> Eric J. L. McInnes,<sup>a</sup> Jürgen Schnack<sup>b</sup> and Richard E. P. Winpenny<sup>a</sup>

<sup>a</sup> School of Chemistry and Photon Science Institute, The University of Manchester, Oxford Road, Manchester M13 9PL, UK. Fax: 44-161-275-1001; E-mail: richard.winpenny@manchester.ac.uk

<sup>b</sup> Department of Physics, The University of Bielefeld, Bielefeld, Germany

#### Experimental Details

All reagents, metal salts and ligands were used as obtained from Aldrich. Analytical data were obtained by the microanalytical service of the University of Manchester.

#### Preparation of starting materials

$[\text{Gd}_2(\text{O}_2\text{C}^t\text{Bu})_6(\text{HO}_2\text{C}^t\text{Bu})_6]$ ,  $[\text{Dy}_2(\text{O}_2\text{C}^t\text{Bu})_6(\text{HO}_2\text{C}^t\text{Bu})_6]$  and  $[\text{Co}_3(\mu_3\text{-O})(\text{O}_2\text{C}^t\text{Bu})_6(\text{py})_3]\cdot\text{O}_2\text{C}^t\text{Bu}$  were prepared as reported.<sup>a,b</sup>

#### Preparation of compounds 1 and 2

Compound **1** was synthesised by reacting a mixture of dysprosium pivalate  $[\text{Dy}_2(\text{O}_2\text{C}^t\text{Bu})_6(\text{HO}_2\text{C}^t\text{Bu})_6]$  (0.46 g, 0.30 mmol),  $[\text{Co}_3(\mu_3\text{-O})(\text{O}_2\text{C}^t\text{Bu})_6(\text{py})_3]\cdot\text{O}_2\text{C}^t\text{Bu}$  (1 g, 0.88 mmol), *tert*-butyl phosphonic acid ( $\text{H}_2\text{O}_3\text{P}^t\text{Bu}$ ) (0.07 g, 0.507 mmol) and pyridine ( $\text{C}_5\text{H}_5\text{N}$ ) (0.5 mL, 6.20 mmol) in acetonitrile ( $\text{CH}_3\text{CN}$ ) (15 ml) for 7 hrs to form a dark brown solution. The solution was filtered and then allowed to stand undisturbed at room temperature for ten days. Light brown colour crystals of **1** suitable for X-ray were collected. Yield 30 mg (10.56%), based on  $[\text{Dy}_2(\text{O}_2\text{C}^t\text{Bu})_6(\text{HO}_2\text{C}^t\text{Bu})_6]$  EA for  $\text{C}_{159}\text{H}_{291}\text{Dy}_{10}\text{Co}_3\text{N}_3\text{O}_{72}\text{P}_6$ , found (calc); C 35.57 (35.46); H 5.48 (5.45); N 0.79 (0.78); Dy 30.21 (30.18); P 3.49 (3.45); Co 3.33 (3.29).

A similar procedure to that used for **1** was used for **2** using  $[\text{Gd}_2(\text{O}_2\text{C}^t\text{Bu})_6(\text{HO}_2\text{C}^t\text{Bu})_6]$  (0.30 mmol) in place of  $[\text{Dy}_2(\text{O}_2\text{C}^t\text{Bu})_6(\text{HO}_2\text{C}^t\text{Bu})_6]$ . Yield 55 mg (19.24 %), based on  $[\text{Gd}_2(\text{O}_2\text{C}^t\text{Bu})_6(\text{HO}_2\text{C}^t\text{Bu})_6]$  EA for  $\text{C}_{159}\text{H}_{291}\text{Dy}_{10}\text{Co}_3\text{N}_3\text{O}_{72}\text{P}_6$ , found (calc); C 35.86 (35.81); H 5.54 (5.50); N 0.80 (0.79); Gd. 29.52 (29.49); P 3.51 (3.49); Co 3.35 (3.31).

a. Y. Zheng, M. Evangelisti, F. Tuna and R. E. P. Winpenny, *J. Amer. Chem. Soc.*, 2012, **134**, 1057.

b. G. Aromi, A. S. Batsanov, P. Christian, M. Helliwell, A. Parkin, S. Parsons, A. A. Smith, G. A. Timco, R. E. P. Winpenny, *Chem. Eur. J.* **2003**, *9*, 5142-5161.

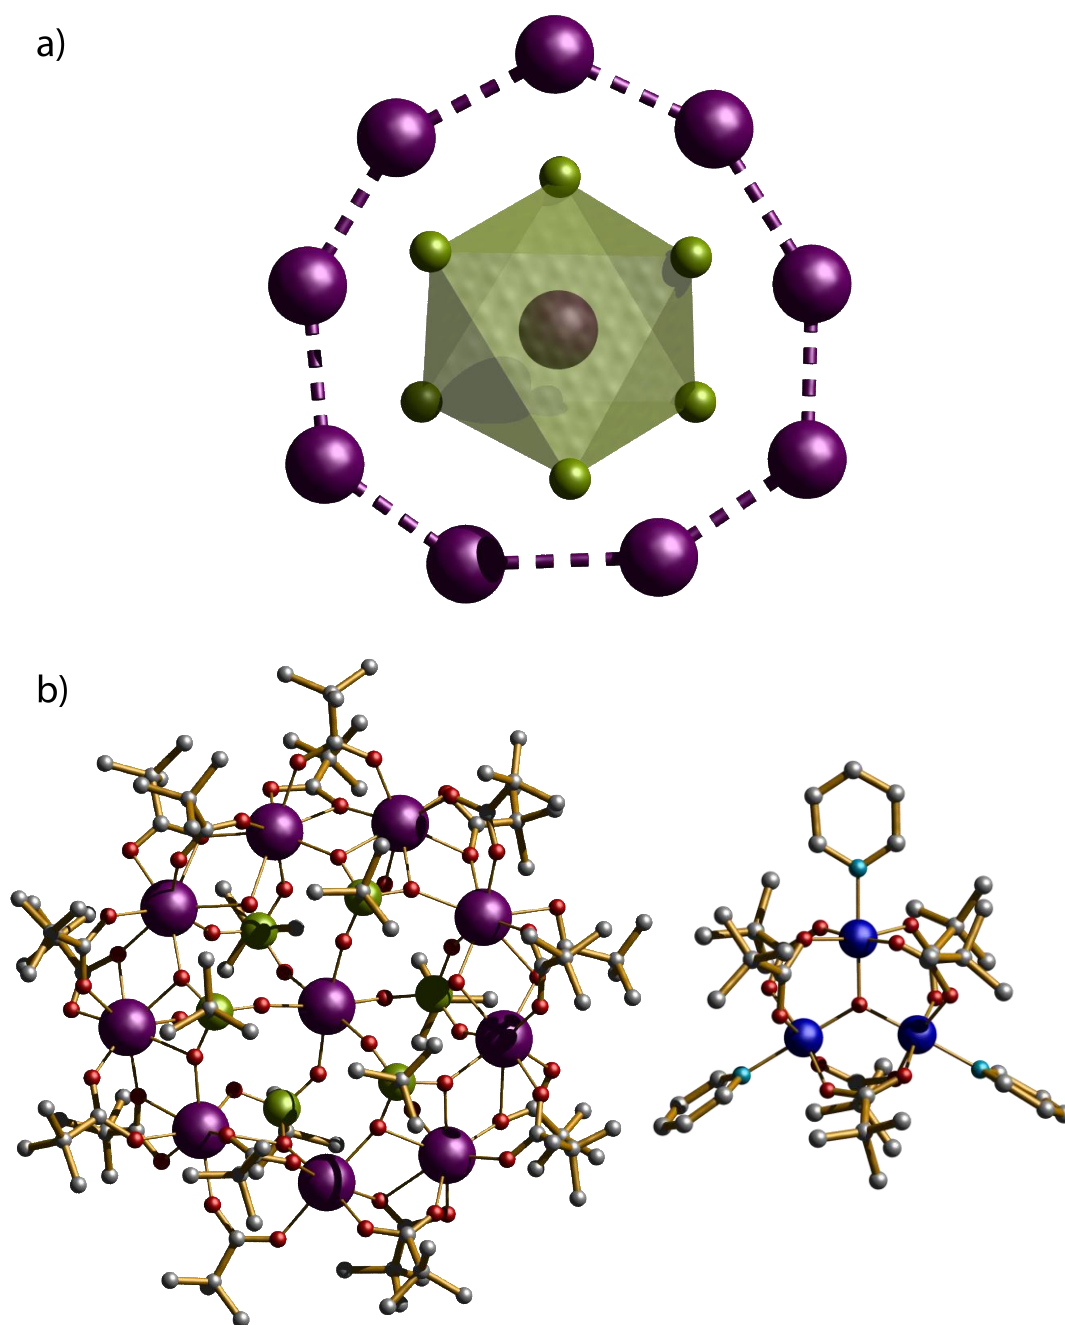

**Figure S1.** a) Polyhedral representation of central Dy with octahedral environment in {Dy<sub>10</sub>};  
b) Crystal structure of anion {Dy<sub>10</sub>} and {Co<sub>3</sub>} cation. Scheme: Dy, purple; P, green; Co, cyan; O, red.

## Magnetic measurements

Magnetic measurements were performed on polycrystalline samples, using a Quantum Design MPMS-XL7 SQUID magnetometer armed with a 7 T magnet. Data were corrected for the diamagnetism of the compounds (Pascal constants) and for diamagnetic contribution of eicosane and the sample holder by measurement.

Fits of data for compound **2**

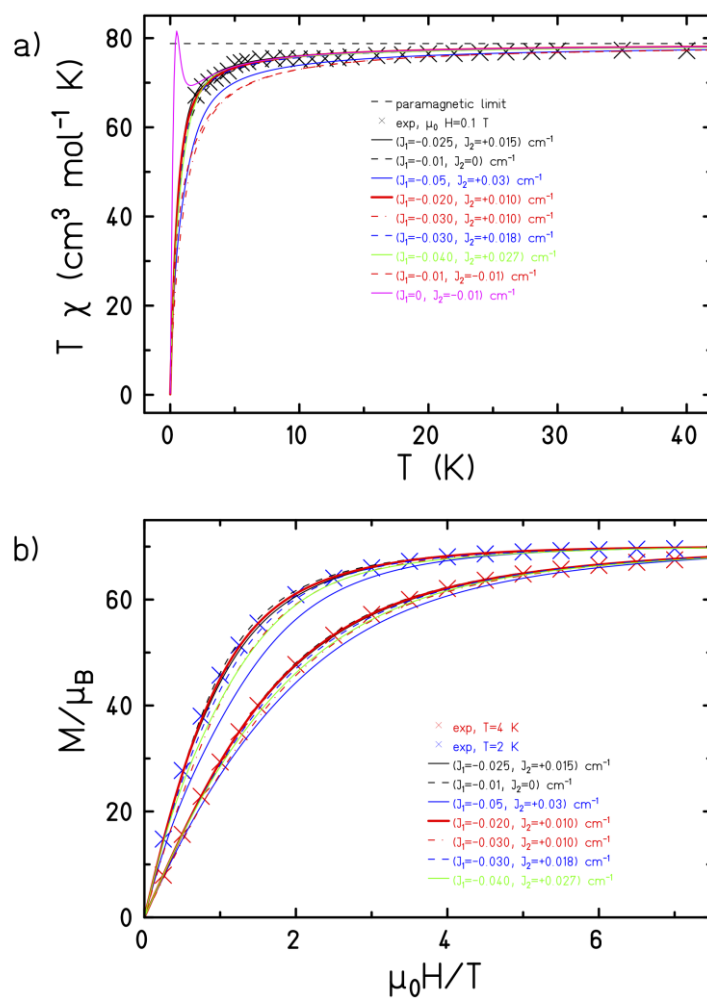

**Figure S2.** Alternative fits of (a)  $\chi T$  vs  $T$  and (b)  $M$  vs  $H$  for compound **2**. The various exchange value parameter sets used are given in the key.

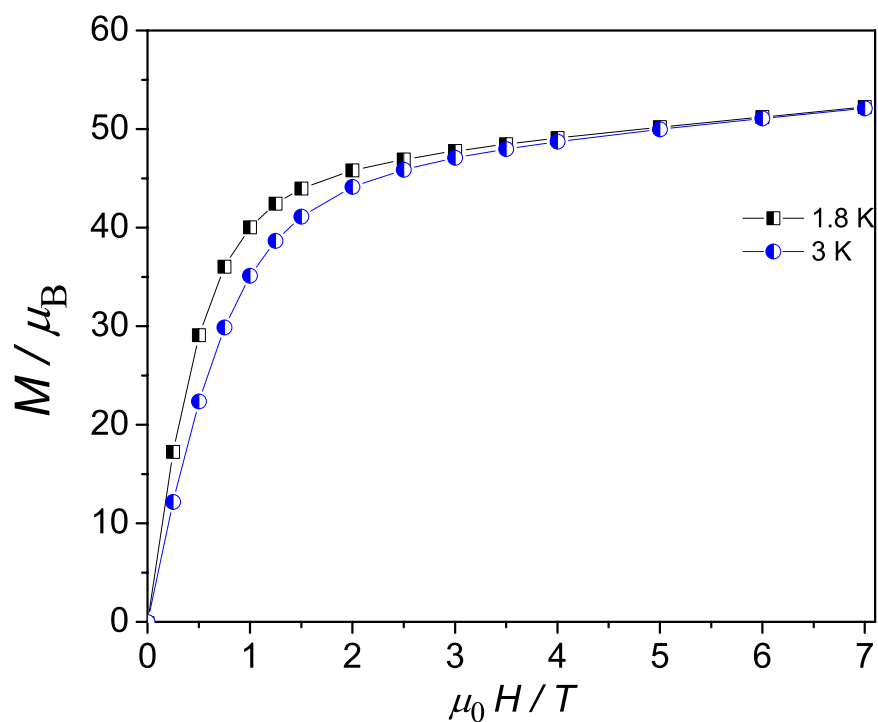

**Figure S3.** Magnetisation as a function of applied field at different temperatures for **1**.

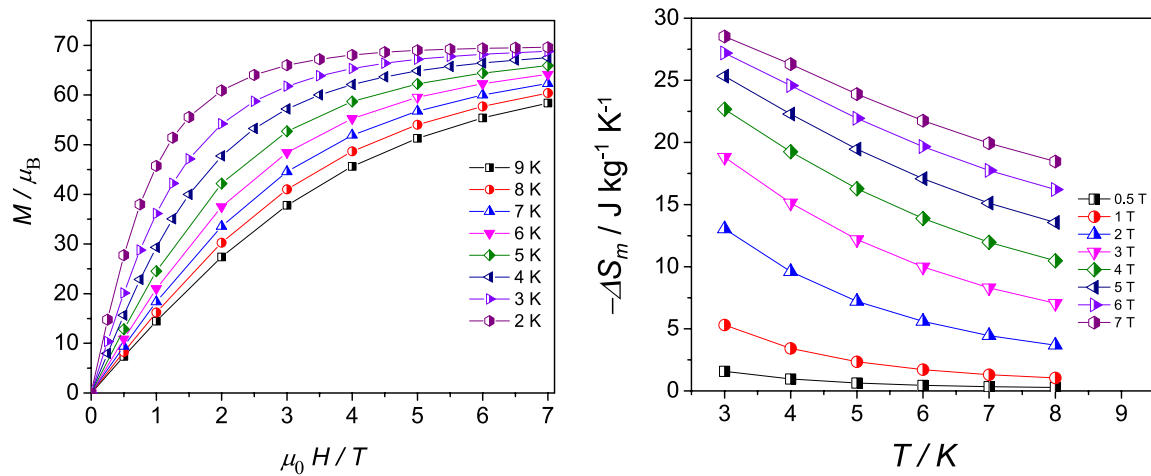

**Figure S4.** Magnetisation as a function of applied field ( $M$  vs  $H/T$ ) at different temperatures (left) for **2** and magnetic entropy change ( $\Delta S_m$ ) of **2** at various field and temperatures (right).
